# Supplementary material for: Prediction of Dengue Outbreaks Based on Disease Surveillance and Meteorological Data
Source: PubMed Central journal article supplement (PMC4816319; doi:10.1371/journal.pone.0152688), 2016-03-31

## S4 File. Comparison of Prediction Accuracy of Several Outbreak Criteria

For the final prediction model derived, we established predictions and calculated the accuracy of the prediction according to a binary classification of months as outbreaks or non-outbreaks. We compared prediction accuracy according to sensitivity, specificity, and positive and negative predictive values of the final prediction model when it was applied to the following outbreak threshold:

1. Constant outbreak threshold: the average of monthly dengue cases during study period (2001-2010), and the incidence rate (>300/100,000)
2. Moving outbreak threshold: the definition of a dengue outbreak in Indonesia<sup>2</sup> and by WHO<sup>3</sup>

**S4 File\_Table 1.** The Comparison of the Prediction Accuracy

| Prediction accuracy | constant outbreak threshold                |                                                       | moving outbreak threshold                 |                                                                   |
|---------------------|--------------------------------------------|-------------------------------------------------------|-------------------------------------------|-------------------------------------------------------------------|
|                     | monthly average cases 2001-2010 = 60 cases | IR > 300/100,000                                      | 2 * dengue lag12 (Badurdeen et al., 2013) | monthly average cases of the preceding 5 years + 2 SD (WHO, 2009) |
| Sensitivity         | 88.9 %                                     | outbreak never existed, according to the surveillance | 75.0 %                                    | 50.0 %                                                            |
| Specificity         | 81.0 %                                     |                                                       | 84.3 %                                    | 98.2 %                                                            |
| PPV                 | 74.4 %                                     |                                                       | 62.1 %                                    | 66.7 %                                                            |
| NPV                 | 92.2 %                                     |                                                       | 90.8 %                                    | 96.5 %                                                            |

**S4 File\_Fig 1.** Outbreak Threshold, Observed and Predicted Dengue Cases from 2001–2010

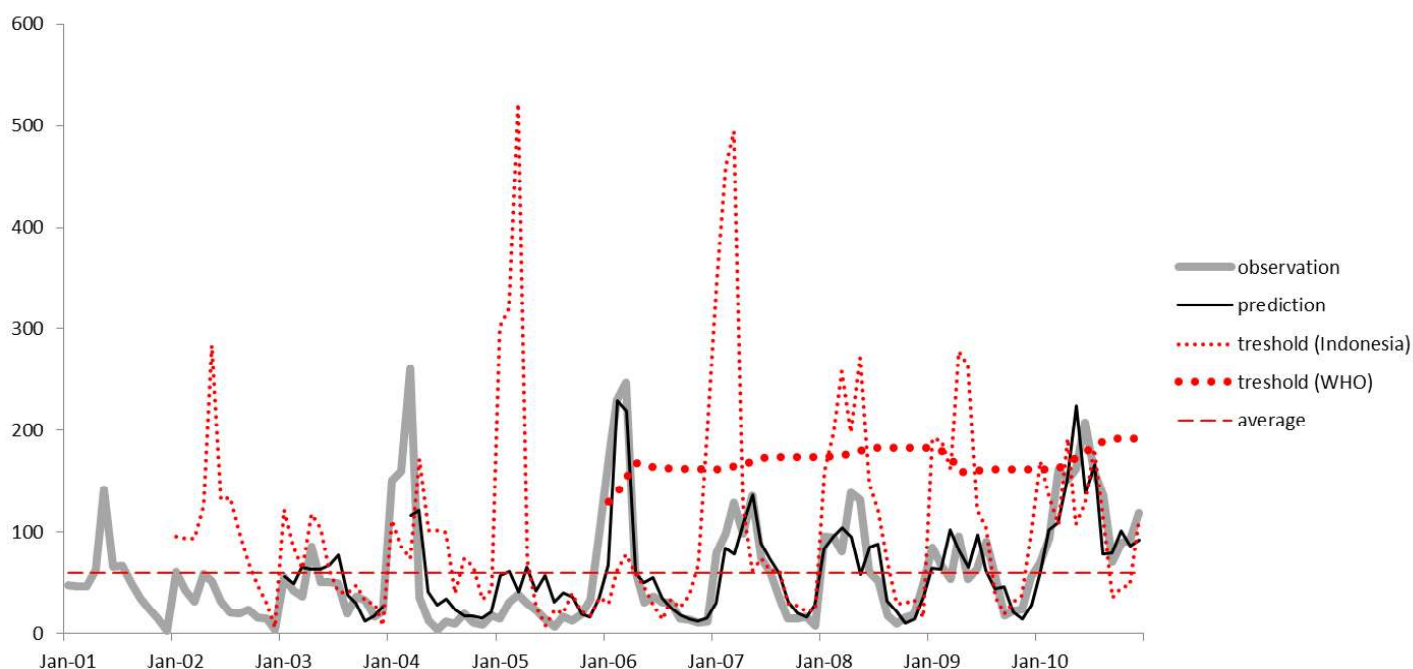

<sup>2</sup> Badurdeen S, Valladares DB, Farrar J, Gozzer E, Kroeger A, Kuswara N, et al. Sharing experiences: towards an evidence based model of dengue surveillance and outbreak response in Latin America and Asia. **BMC public health.** 2013;13(1):607

<sup>3</sup> World Health Organization. **Dengue: guideline for diagnosis, treatment, prevention and control.** Geneva: World Health Organization; 2009

**S4 File\_Fig 2.** Outbreak Threshold (300 cases per 100.000) and Monthly Incidence (per 100.000) from 2001–2010

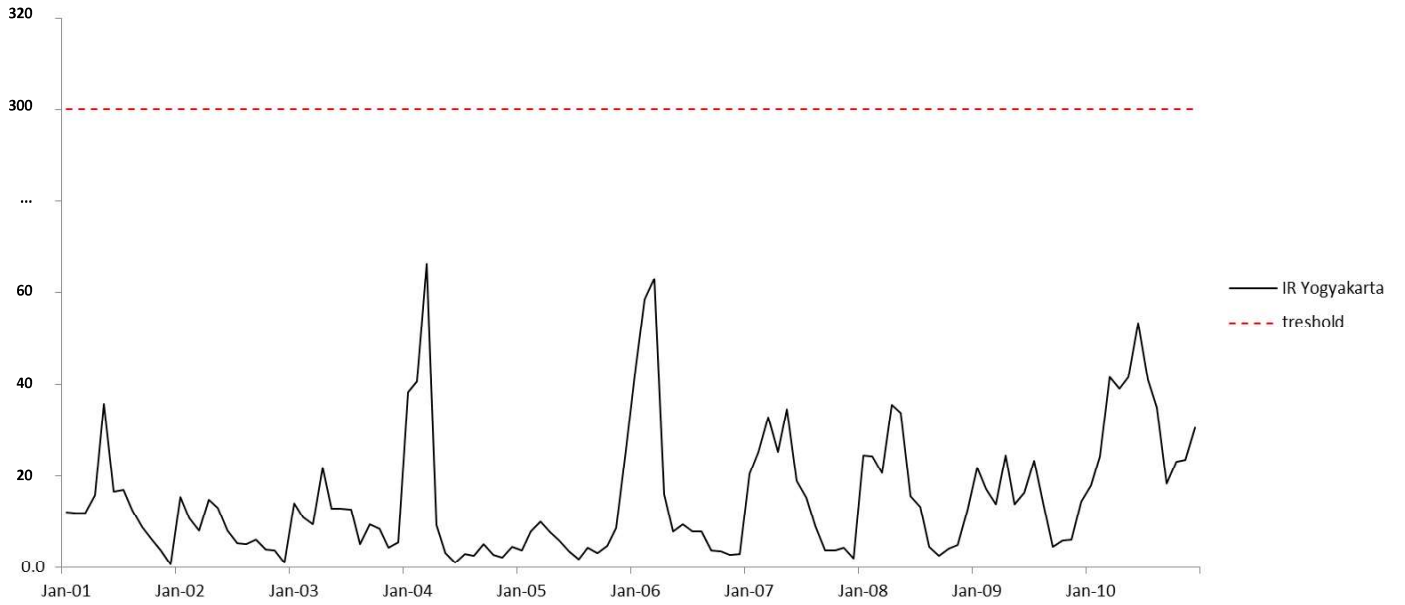

Supplement: pone.0152688.s005.pdf [file pone.0152688.s005.pdf]
