# Supplementary material for: Prediction of Dengue Outbreaks Based on Disease Surveillance and Meteorological Data
Source: PubMed Central journal article supplement (PMC4816319; doi:10.1371/journal.pone.0152688), 2016-03-31

# Supporting Information

**S1 Fig.** Cross-correlation between Outcome and Predictors

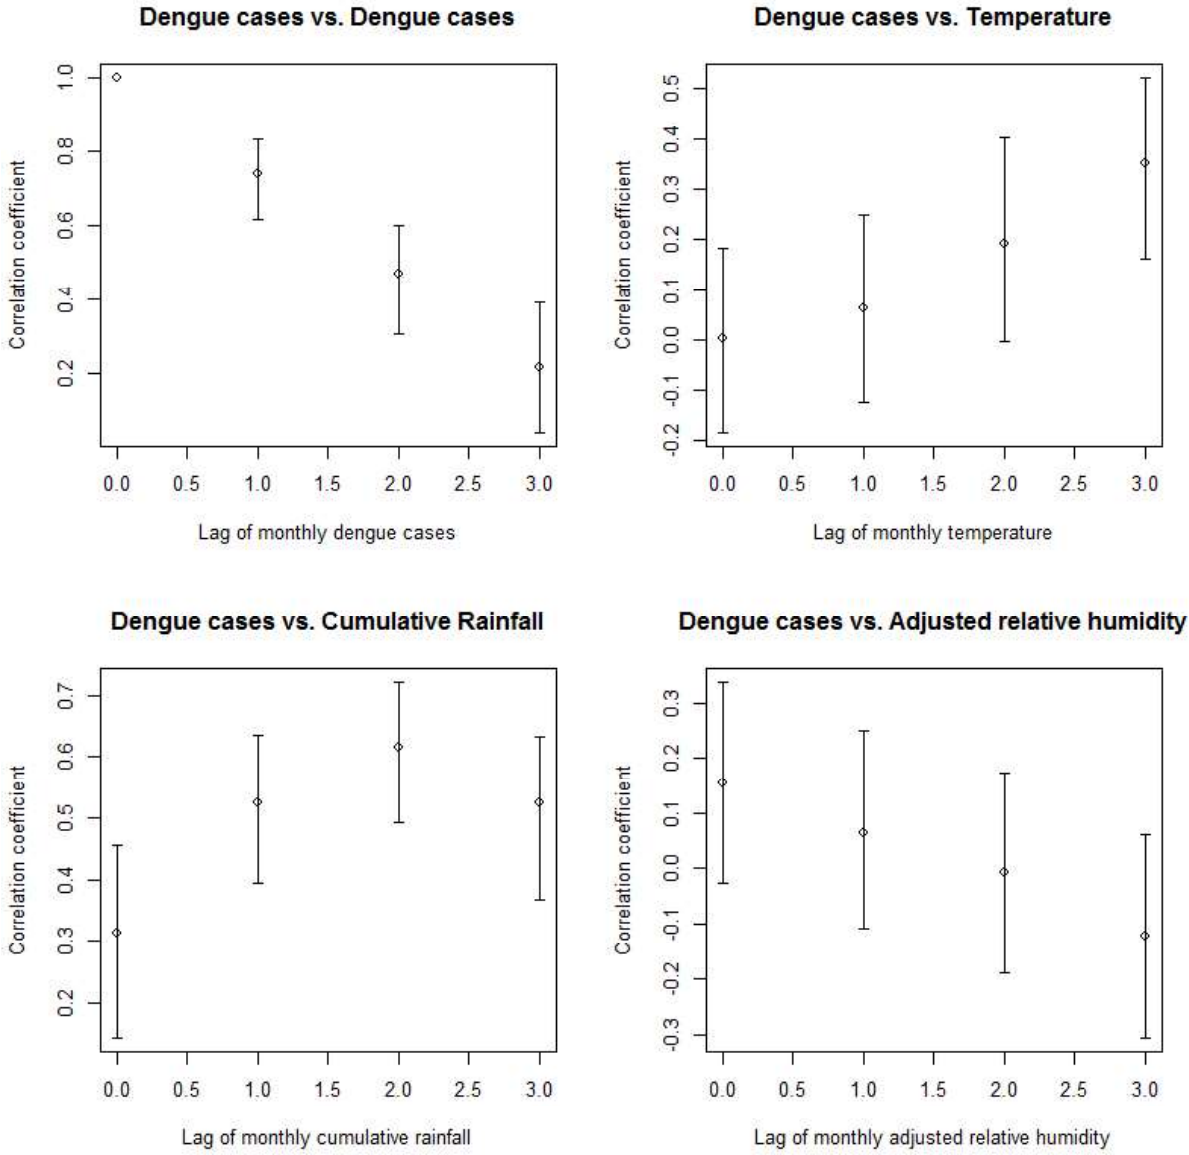

Supplement: pone.0152688.s001.pdf [file pone.0152688.s001.pdf]
