# Supplementary material for: Prediction of Dengue Outbreaks Based on Disease Surveillance and Meteorological Data
Source: PubMed Central journal article supplement (PMC4816319; doi:10.1371/journal.pone.0152688), 2016-03-31
Supplement: pone.0152688.s002.pdf [file pone.0152688.s002.pdf]

## S1 File. Outcome Distribution

Diagnostic plot of the variance to mean relationship for dengue dataset, suggests the quasi-Poisson is a better fit to the overall variance-mean relationship.

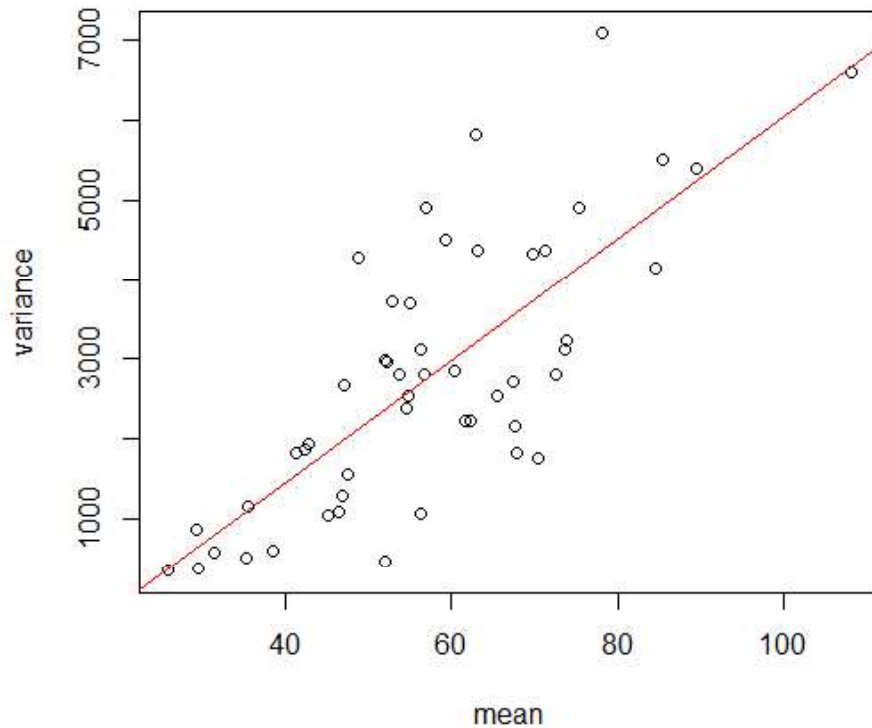

**S1 File\_Fig 1.** Estimated Variance-to-Mean Relationship for Dengue Cases Dataset

The quasi-Poisson regression is providing a little bit better fits in the study.

**S1 File\_Table 1.** Predictive Performance Statistics, quasi-Poisson (QP) vs. Negative Binomial (NB)

| Model                        | RMSE   |        | SRMSE |       | R-sq.(adj) |       |
|------------------------------|--------|--------|-------|-------|------------|-------|
|                              | QP     | NB     | QP    | NB    | QP         | NB    |
| Meteorology Optimal          | 44.540 | 44.726 | 0.553 | 0.556 | 0.282      | 0.275 |
| Surveillance: Short-term Lag | 45.046 | 45.151 | 0.560 | 0.561 | 0.294      | 0.291 |
| Surveillance: Optimal Lag    | 41.846 | 42.347 | 0.520 | 0.526 | 0.443      | 0.430 |
| Optimal Representation       | 32.448 | 33.290 | 0.403 | 0.414 | 0.636      | 0.620 |

QP: quasi-Poisson

NB: negative-binomial
