# Supplementary material for: Prediction of Dengue Outbreaks Based on Disease Surveillance and Meteorological Data
Source: PubMed Central journal article supplement (PMC4816319; doi:10.1371/journal.pone.0152688), 2016-03-31
Supplement: pone.0152688.s004.pdf [file pone.0152688.s004.pdf]

### S3 File. Population Offset

Population data for study location is obtained from the Central Bureau of Statistics, Yogyakarta Province<sup>1</sup>. The annual population growth rate in Yogyakarta Municipality is below 1% during 1990-2010, thus the population was relatively stationary during the study period.

**S3 File\_Table 1.** Population Growth Rate per Year in Yogyakarta Municipality

| Census | Pop    | Growth Rate/year |
|--------|--------|------------------|
| 1961   | 306296 | NA               |
| 1971   | 340491 | 0,0106           |
| 1980   | 398089 | 0,0174           |
| 1990   | 412059 | 0,0034           |
| 2000   | 396711 | -0,0038          |
| 2010   | 388627 | -0,0021          |

The Table below illustrate that adding population as offset in this case study does not change much due to the stable population in the study period.

**S3 File\_Table 2.** Predictive Performance Statistics, without and with offset

| Offset contribution | R-sq.(adj) | AIC     | Training Dataset |       | External Dataset |       |
|---------------------|------------|---------|------------------|-------|------------------|-------|
|                     |            |         | RMSE             | SRMSE | RMSE             | SRMSE |
| Model D             | 0.636      | 2311.60 | 32.448           | 0.403 | 39.491           | 0.613 |
| Model D + offset    | 0.636      | 2315.32 | 32.476           | 0.404 | 38.966           | 0.605 |

---

<sup>1</sup> Badan Pusat Statistik (BPS) Provinsi Daerah Istimewa Yogyakarta. **Penduduk Provinsi Daerah Istimewa Yogyakarta Hasil Sensus Penduduk 1961-2010** [Internet]. Yogyakarta: Badan Pusat Statistik (BPS) Provinsi Daerah Istimewa Yogyakarta; 2013 [cited 2015 Dec 10]. Available from: [http://yogyakarta.bps.go.id/website/pdf\\_publicasi/Penduduk-Provinsi-Daerah-Istimewa-Yogyakarta-Hasil-Sensus-Penduduk-1961-2010.pdf](http://yogyakarta.bps.go.id/website/pdf_publicasi/Penduduk-Provinsi-Daerah-Istimewa-Yogyakarta-Hasil-Sensus-Penduduk-1961-2010.pdf). Indonesian.
