# Supplementary material for: Prediction of Dengue Outbreaks Based on Disease Surveillance and Meteorological Data
Source: PubMed Central journal article supplement (PMC4816319; doi:10.1371/journal.pone.0152688), 2016-03-31
Supplement: pone.0152688.s006.pdf [file pone.0152688.s006.pdf]

### S1 Table. Initial Analyses Summary

| <b>Results</b>      |             |             |             |             |
|---------------------|-------------|-------------|-------------|-------------|
| <b>P-value</b>      | <b>Lag0</b> | <b>Lag1</b> | <b>Lag2</b> | <b>Lag3</b> |
| - Temperature       | 0.8305      | 0.9730      | 0.5327      | 0.0326*     |
| - Rainfall          | 0.2338      | 0.2149      | 0.0227*     | 0.0118*     |
| - Adjusted Humidity | 0.4802      | 0.4249      | 0.7811      | 0.3414      |
| <b>R-sq.(adj)</b>   | 0.31        |             |             |             |
| <b>RMSE</b>         | 41.468      |             |             |             |
| <b>SRMSE</b>        | 0.516       |             |             |             |
